# Supplementary material for: The Pseudo-Symmetric N-benzyl Hydroxyethylamine Core in a New Series of Heteroarylcarboxyamide HIV-1 Pr Inhibitors: Synthesis, Molecular Modeling and Biological Evaluation
Source: MDPI journal article supplement (doi:10.3390/biom11111584), 2021-10-26
Supplement: s1 [file s1]

## Supplementary material

**The pseudo-symmetric *N*-benzyl hydroxyethylamine *core* in a new series of heteroarylcarboxamide HIV-1 Pr inhibitors: synthesis, molecular modeling and biological evaluation.**

### Table of contents

|                                                                                                               |                |
|---------------------------------------------------------------------------------------------------------------|----------------|
| Copies of <sup>1</sup> H and <sup>13</sup> C NMR spectra of compounds <b>5c</b> and <b>6c</b>                 | <b>S2-S3</b>   |
| Copies of <sup>1</sup> H and <sup>13</sup> C NMR spectra of compounds <b>7a-c</b> , <b>8a-c</b> , <b>9a-c</b> | <b>S4-S12</b>  |
| Supplementary figures S1-S4                                                                                   | <b>S13-S17</b> |

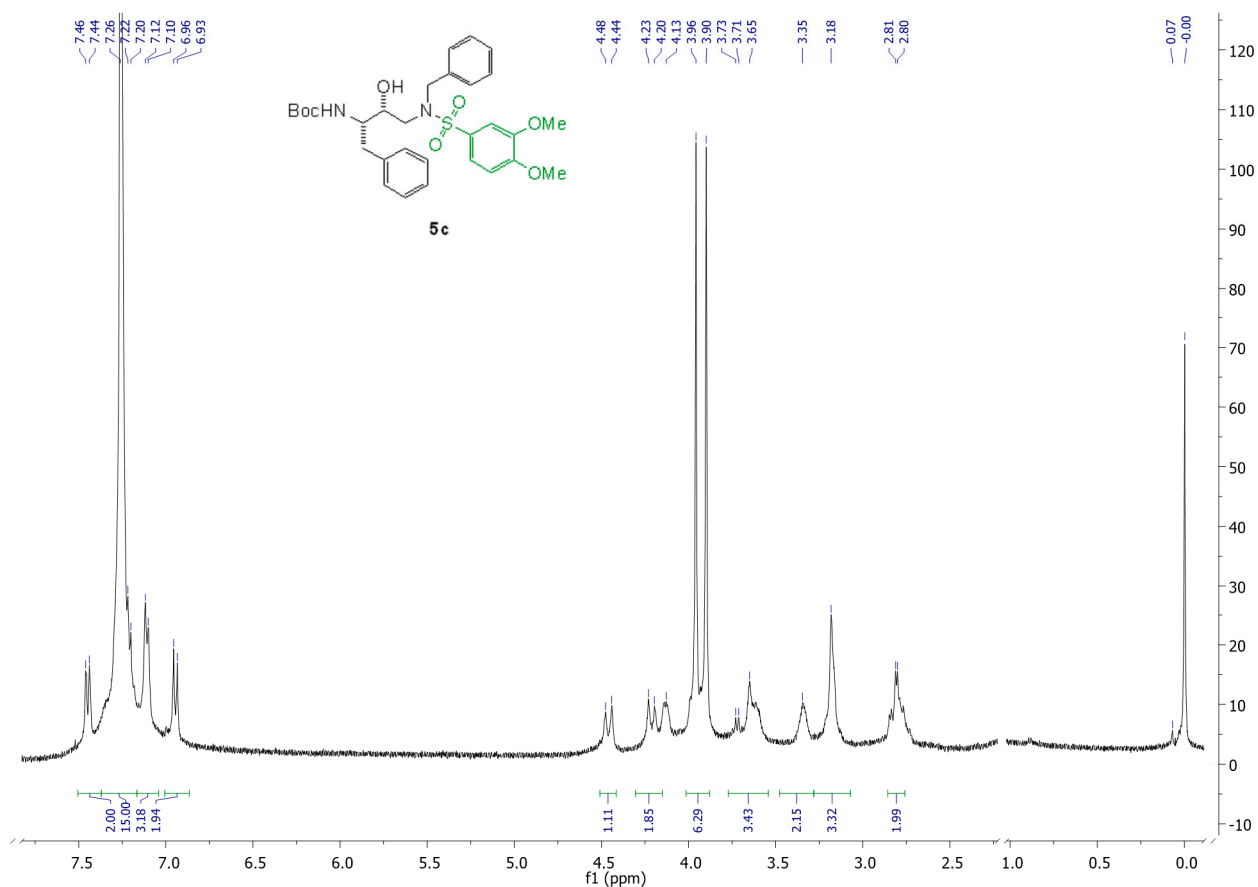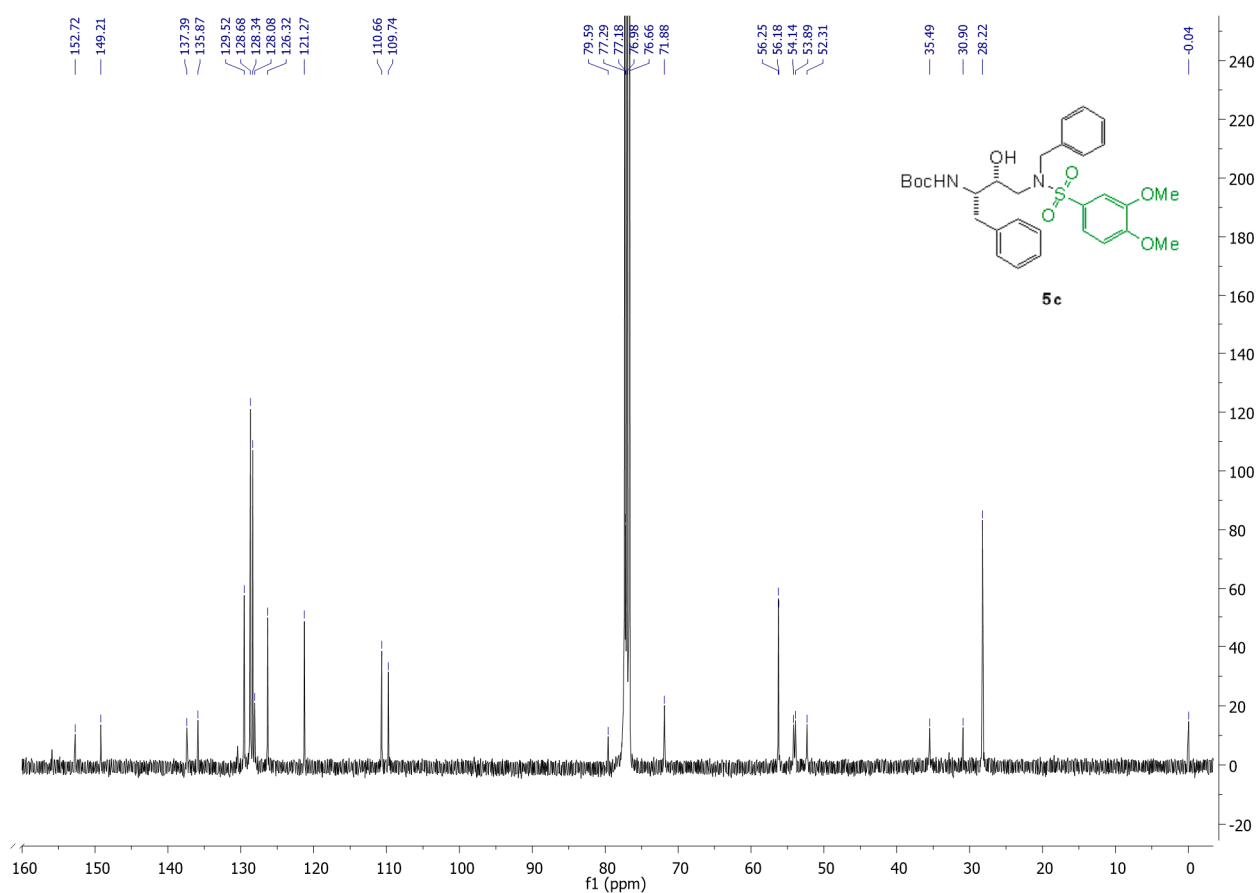

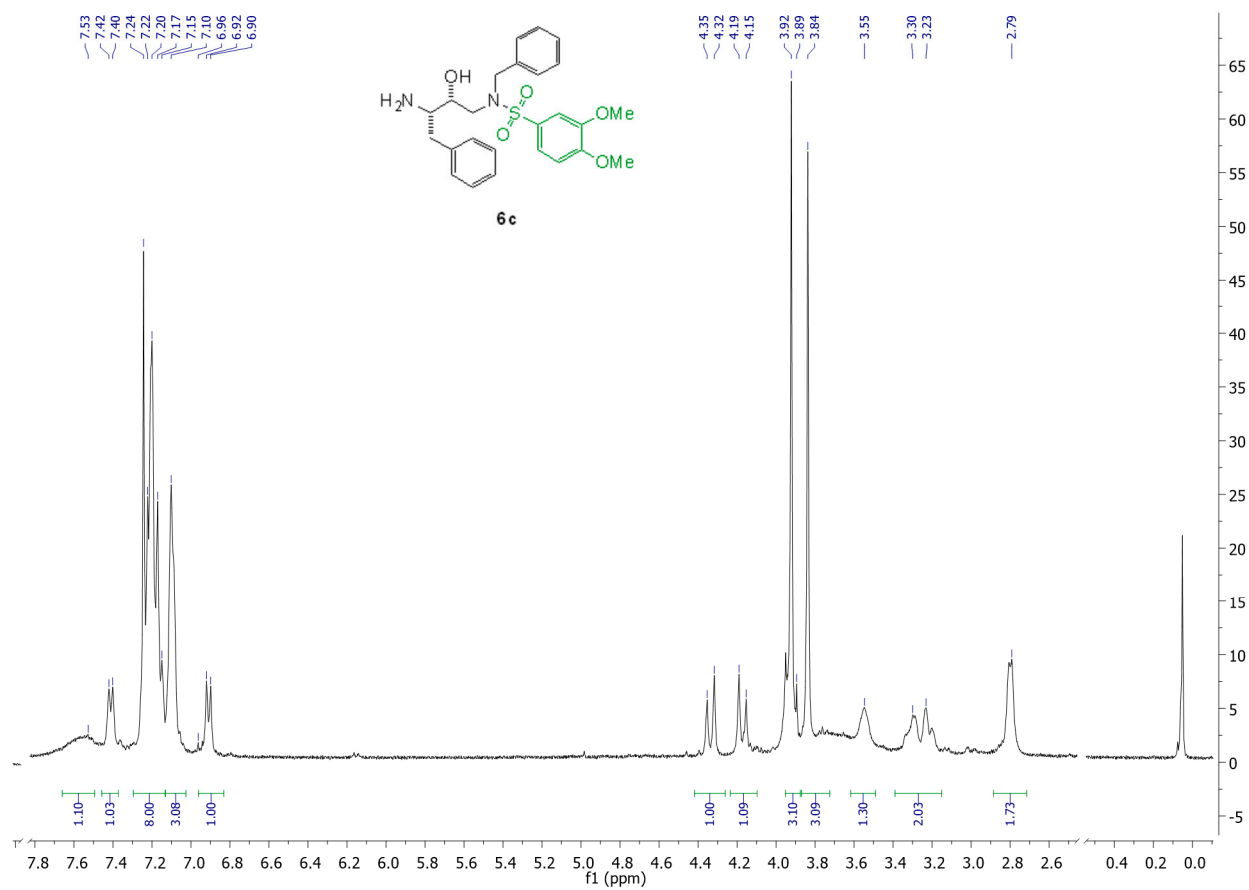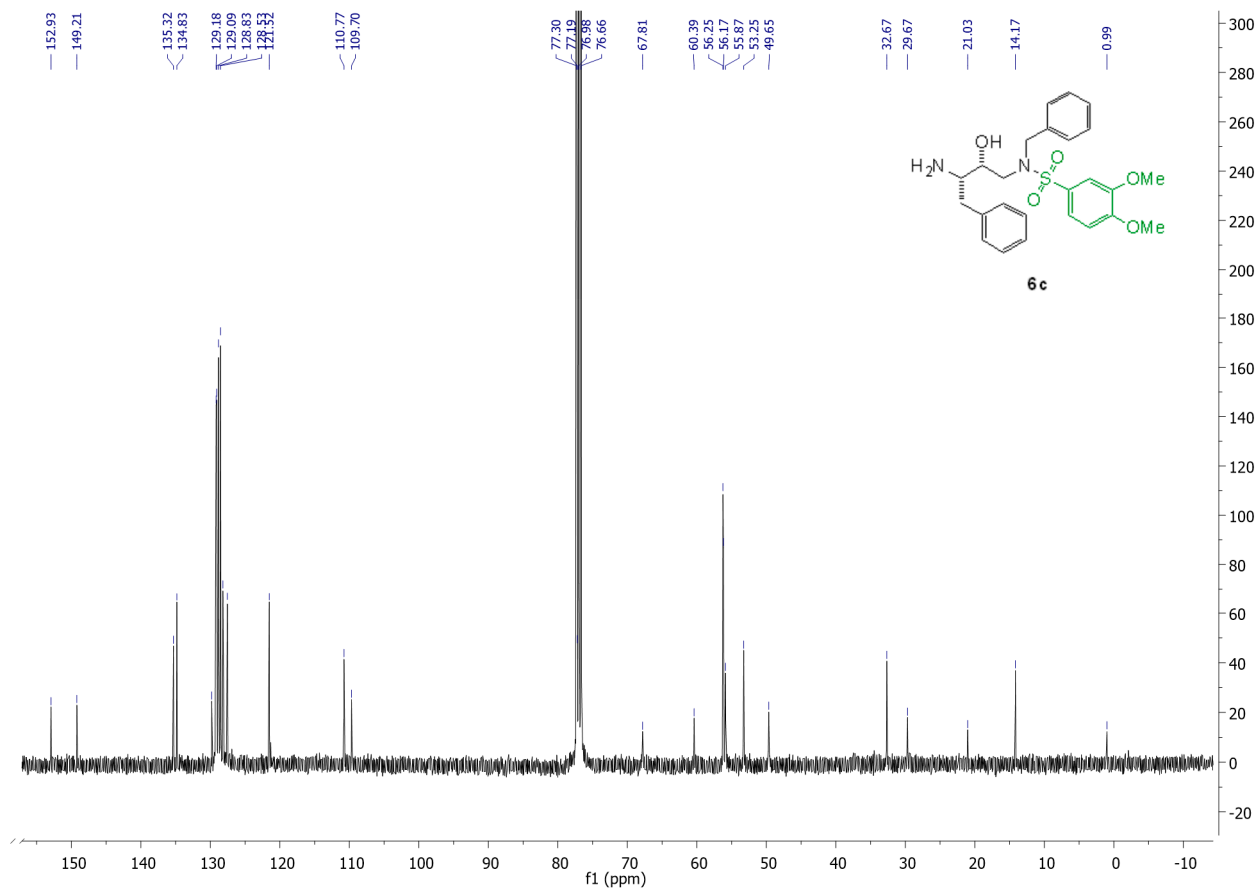

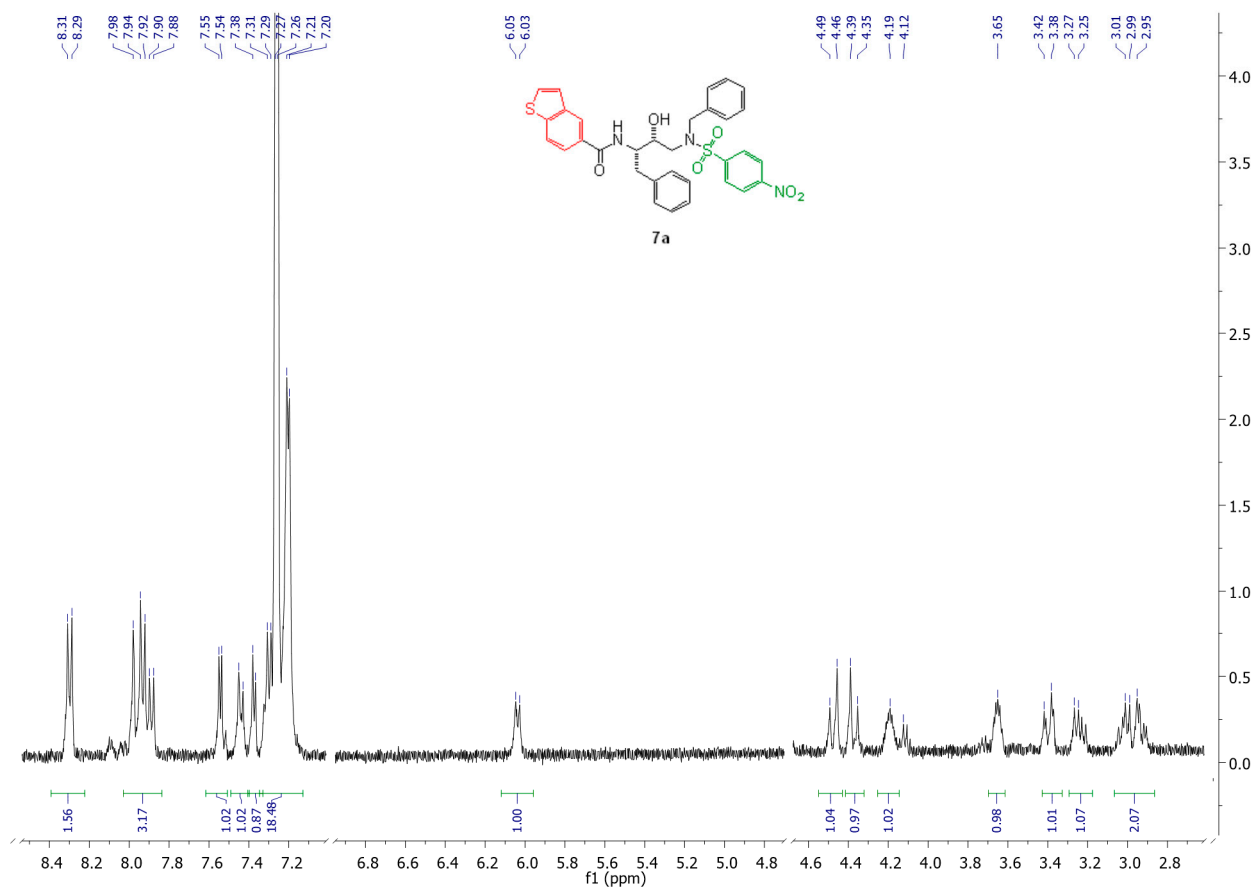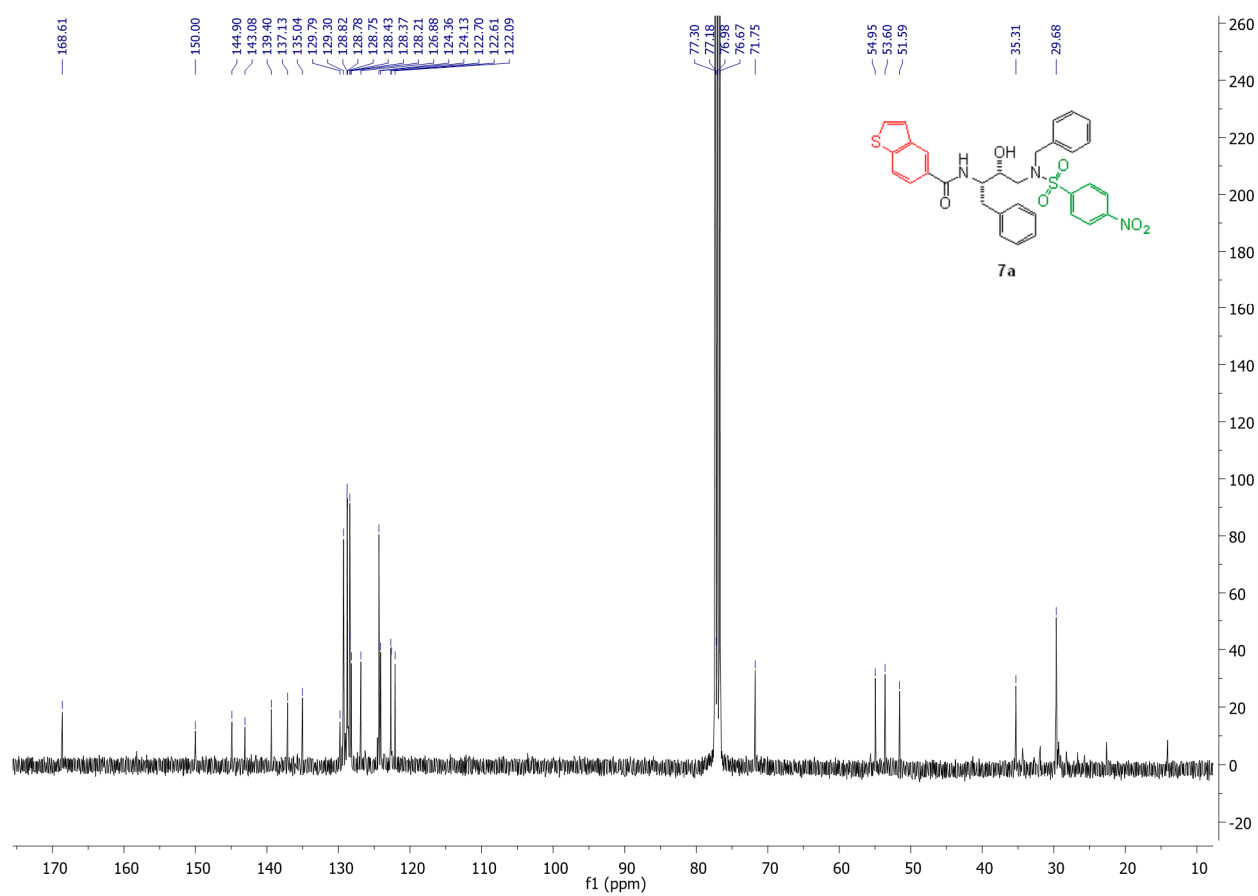

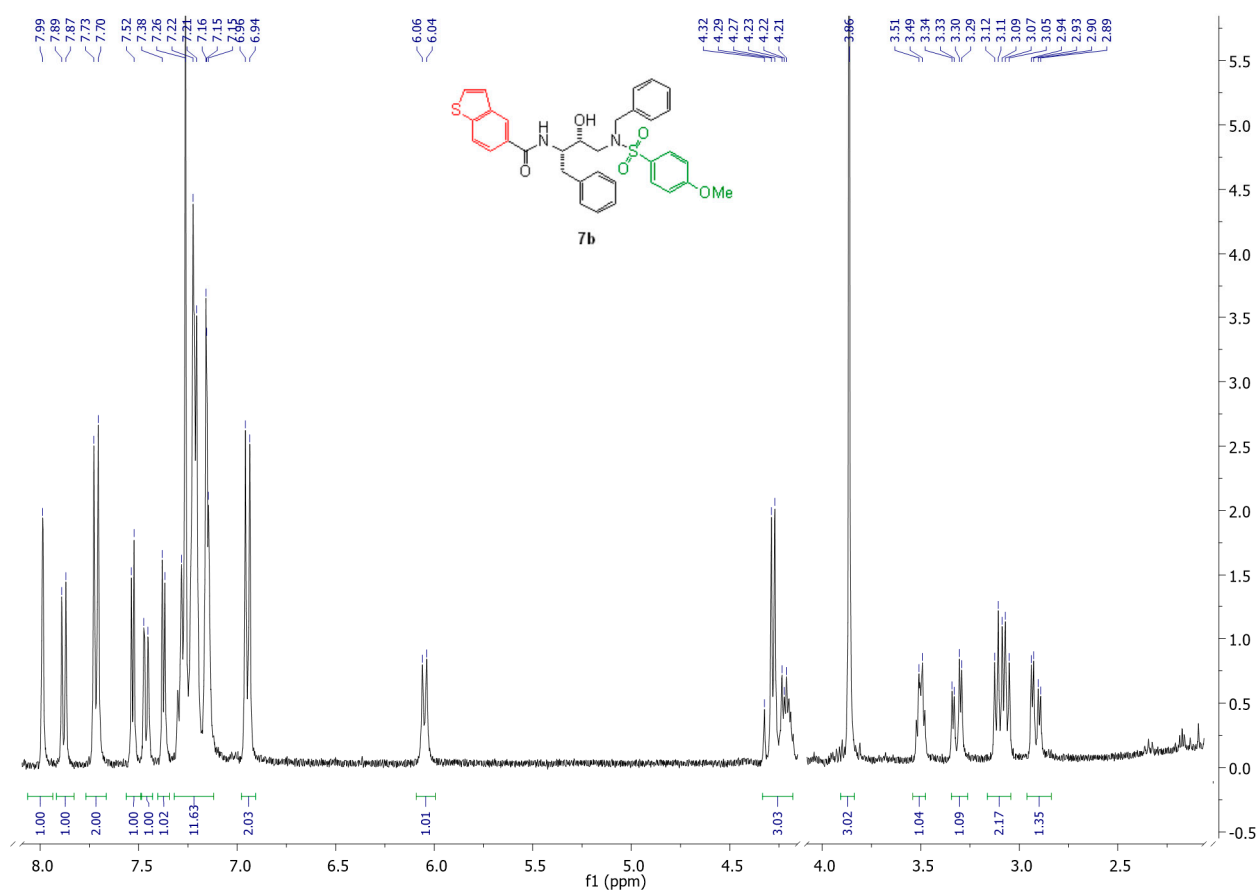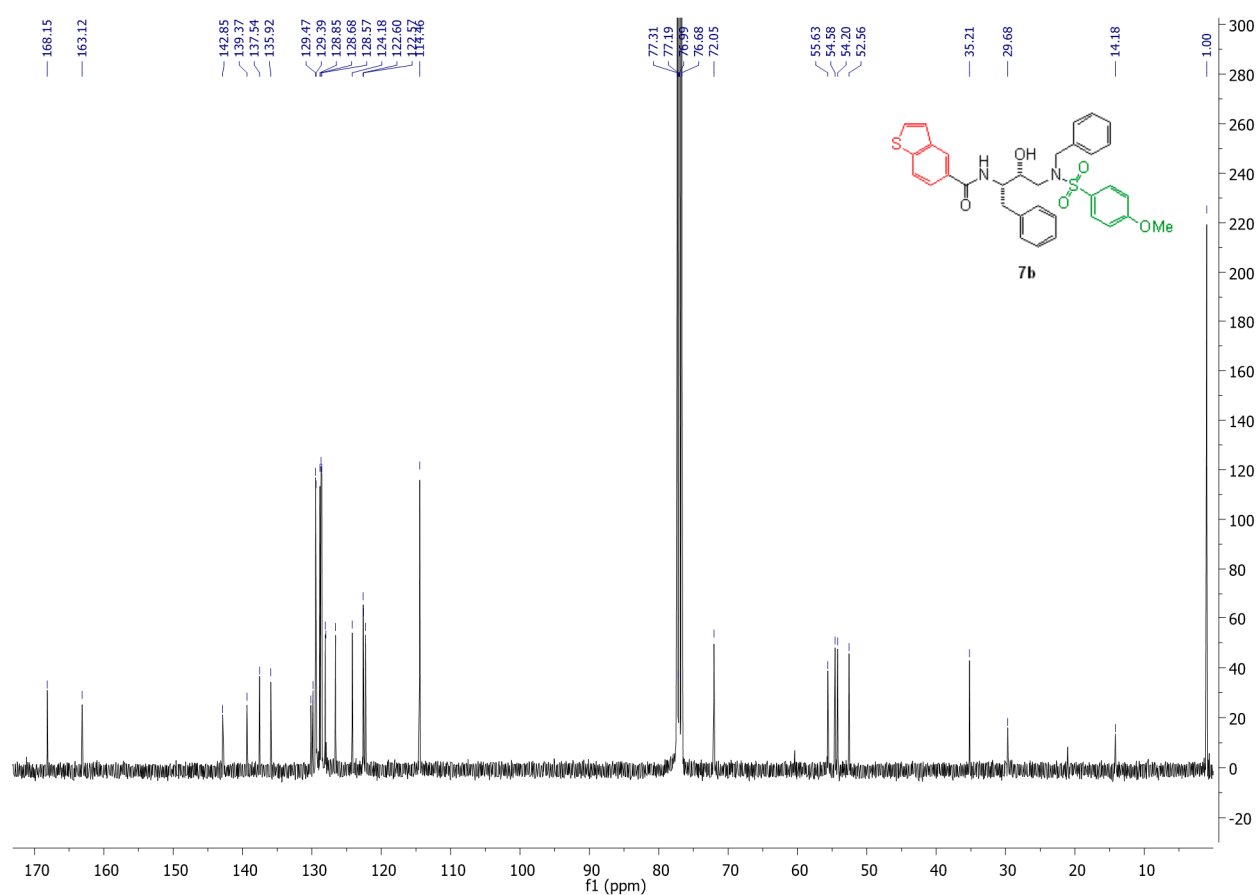

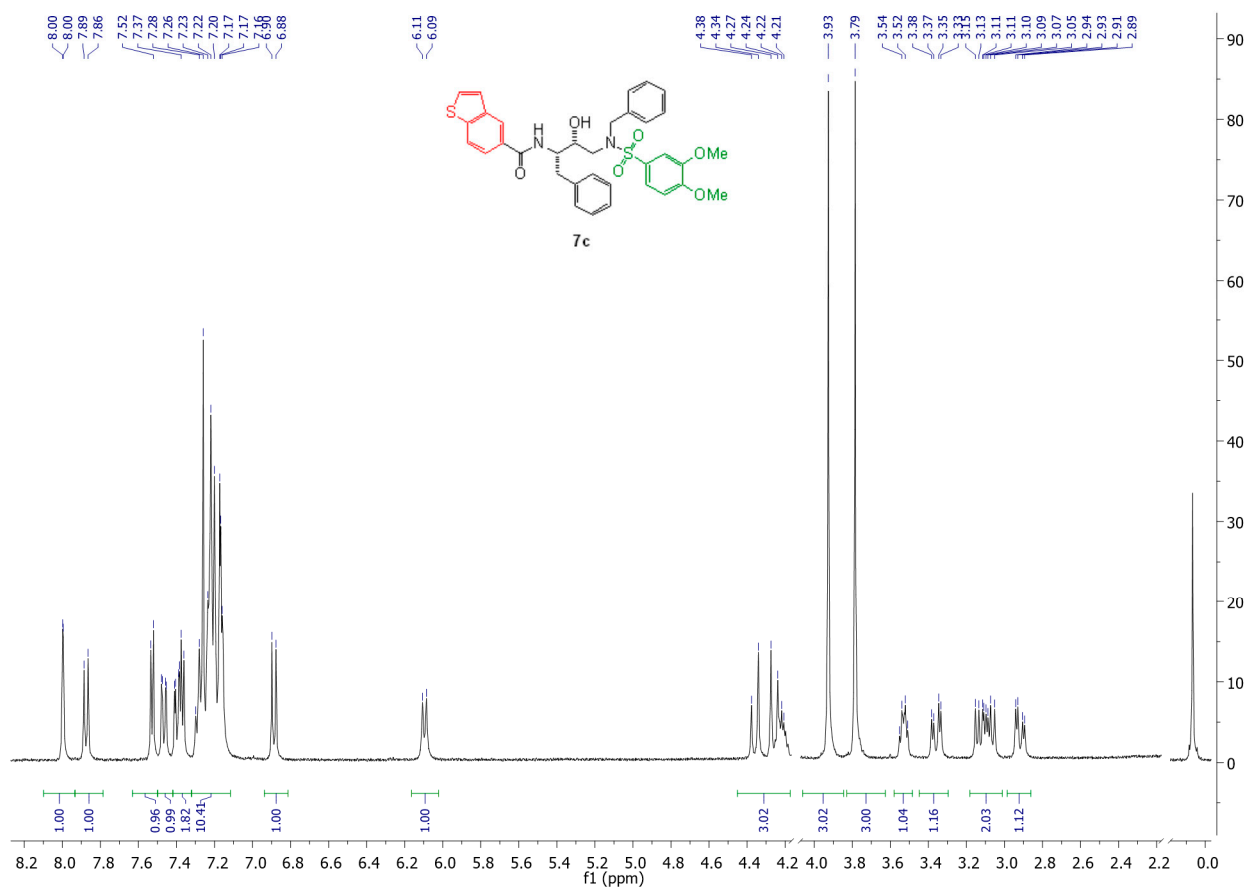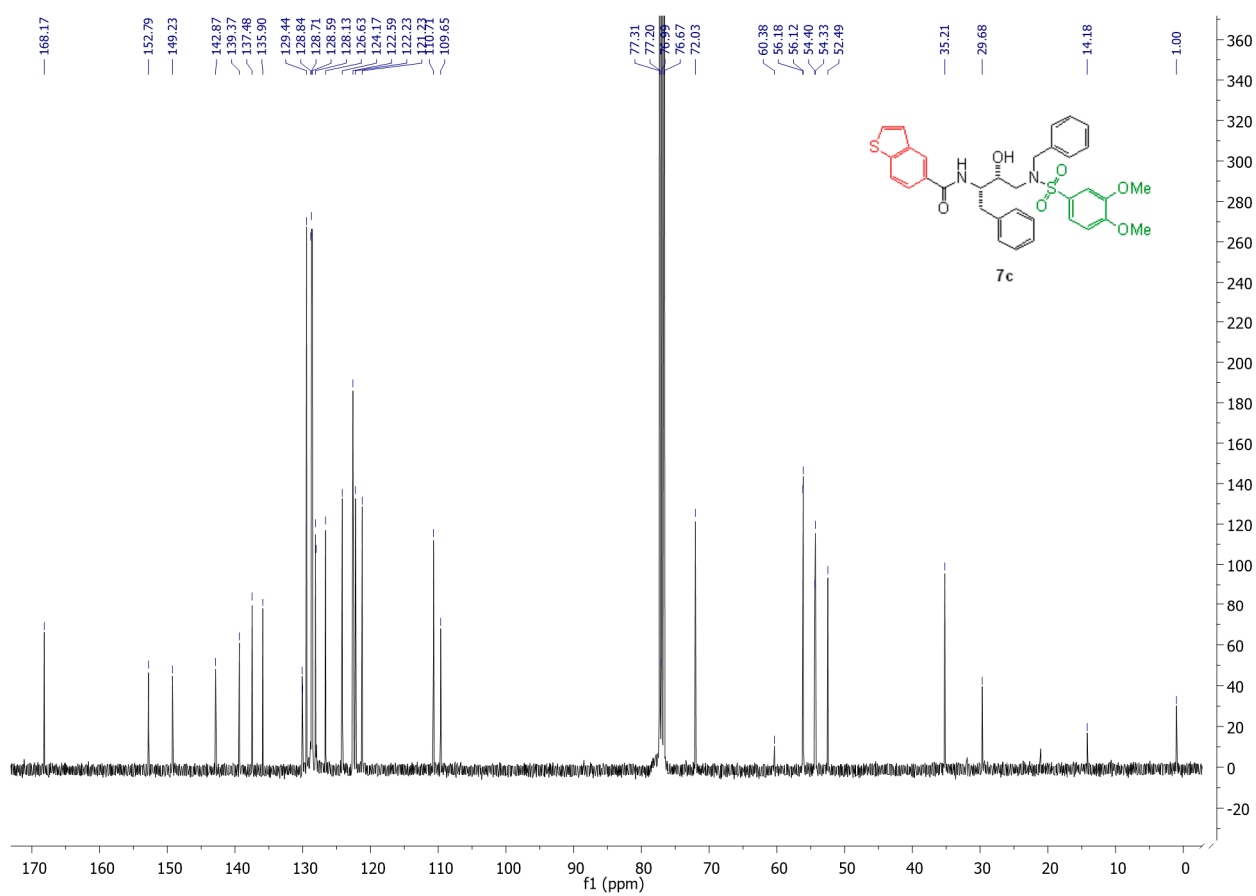

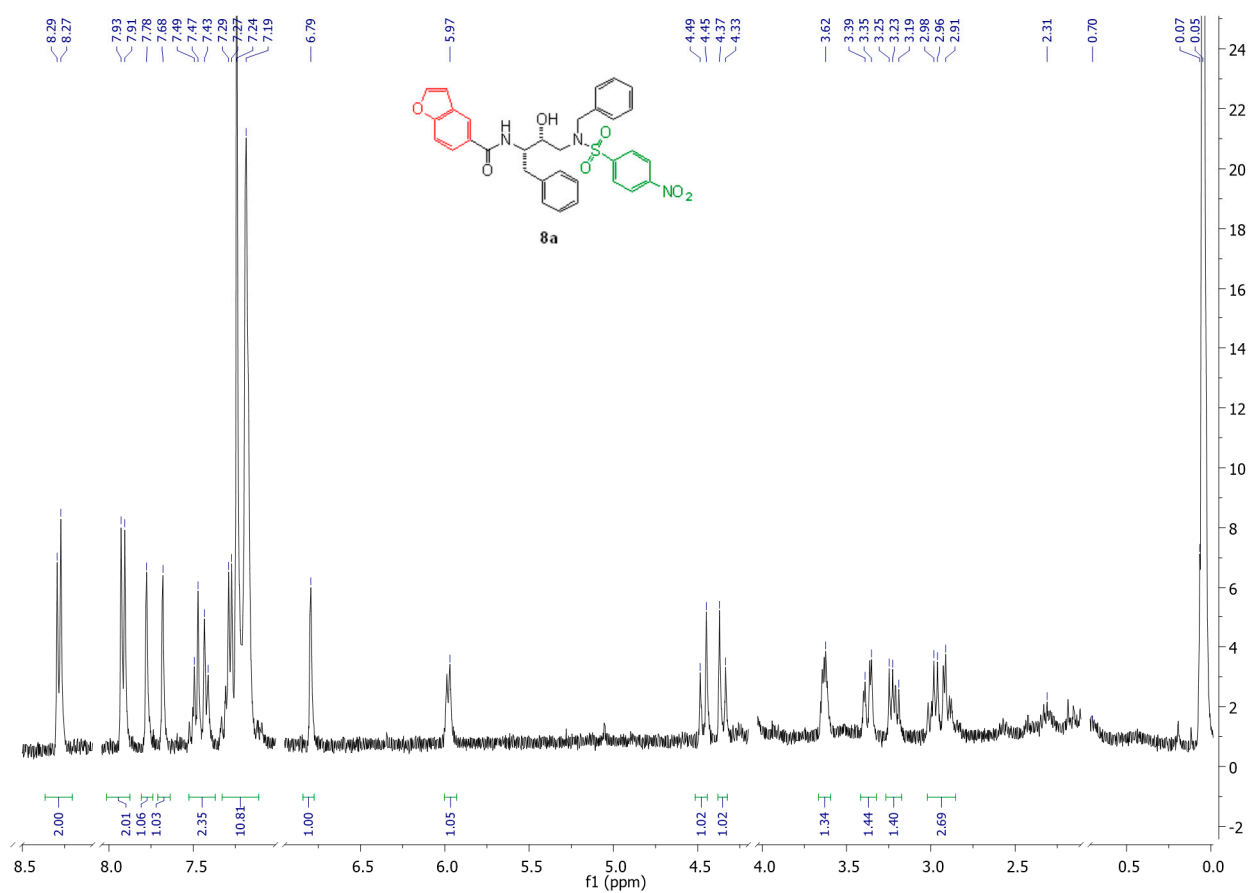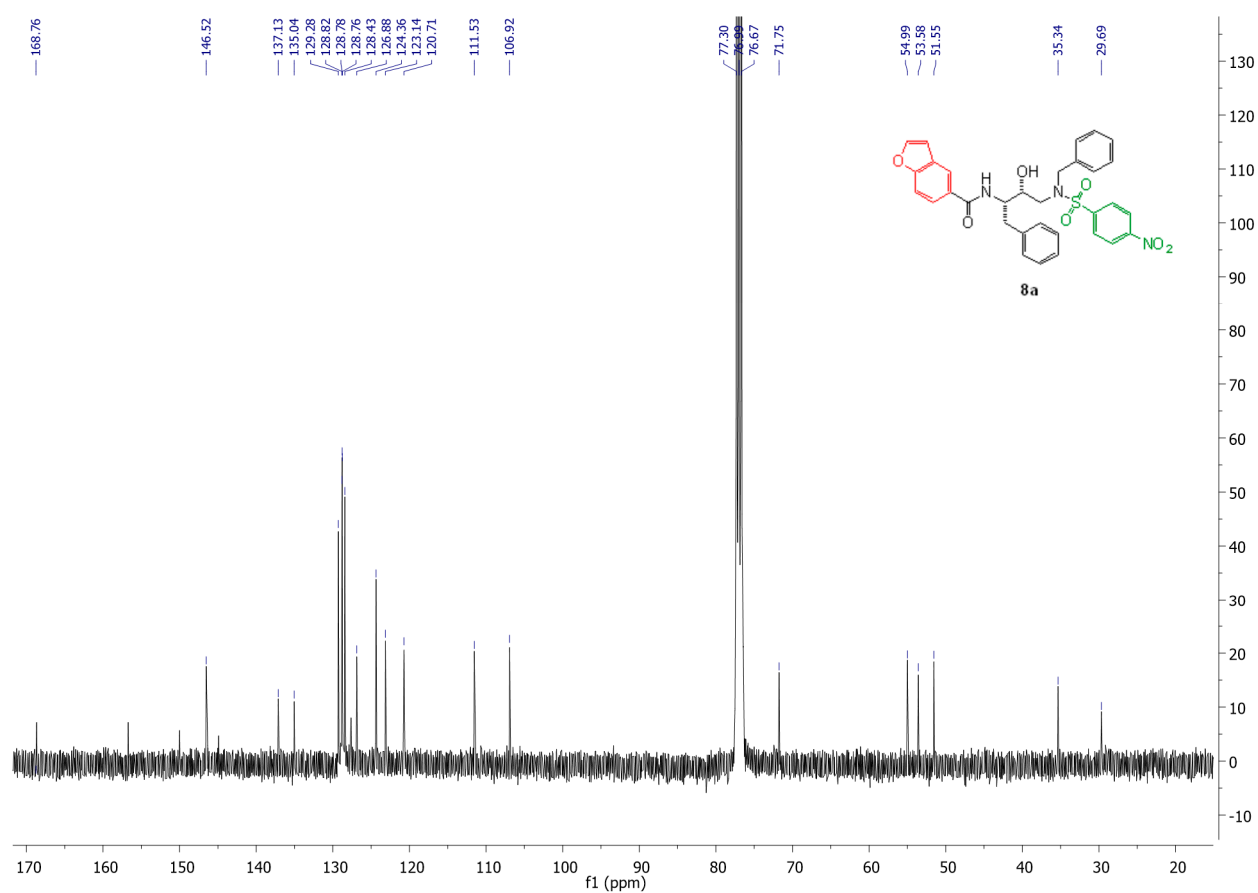

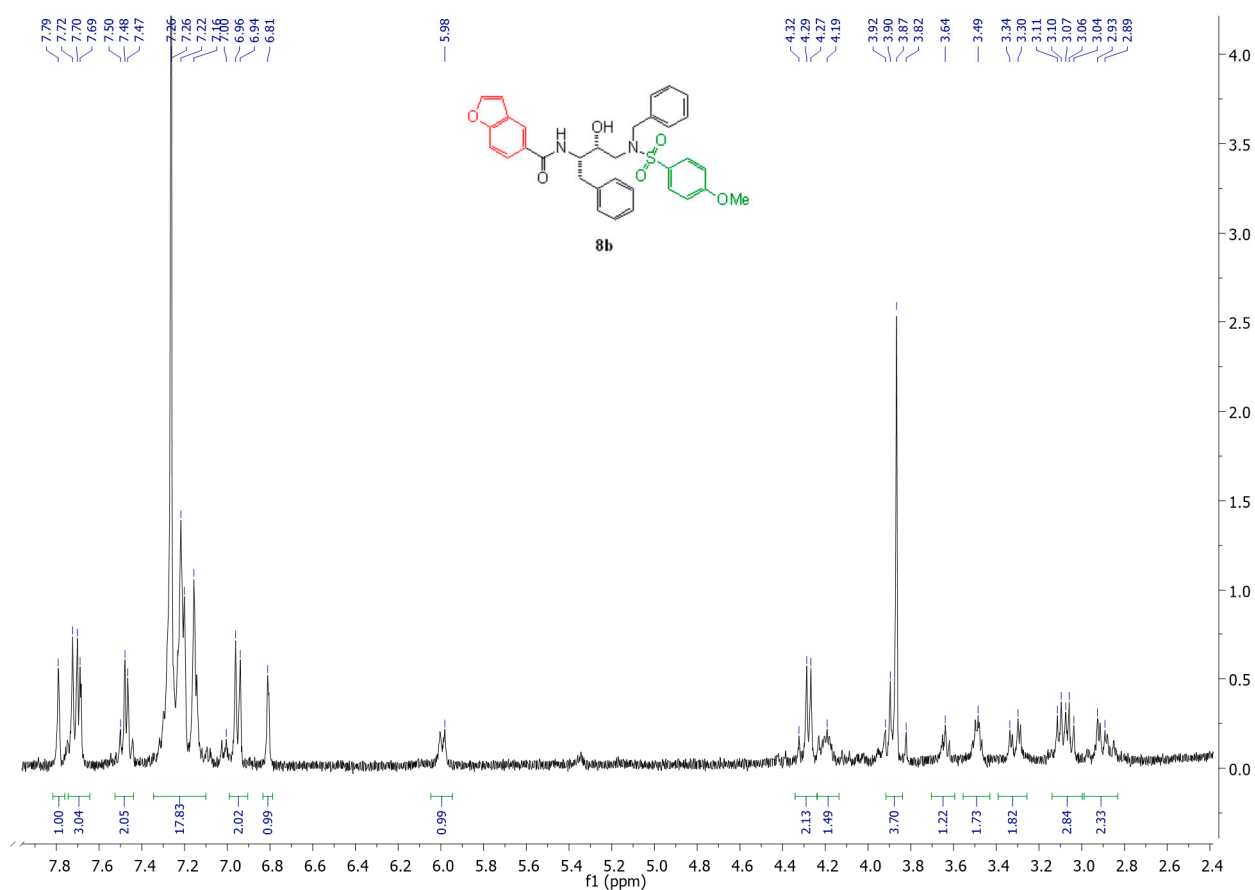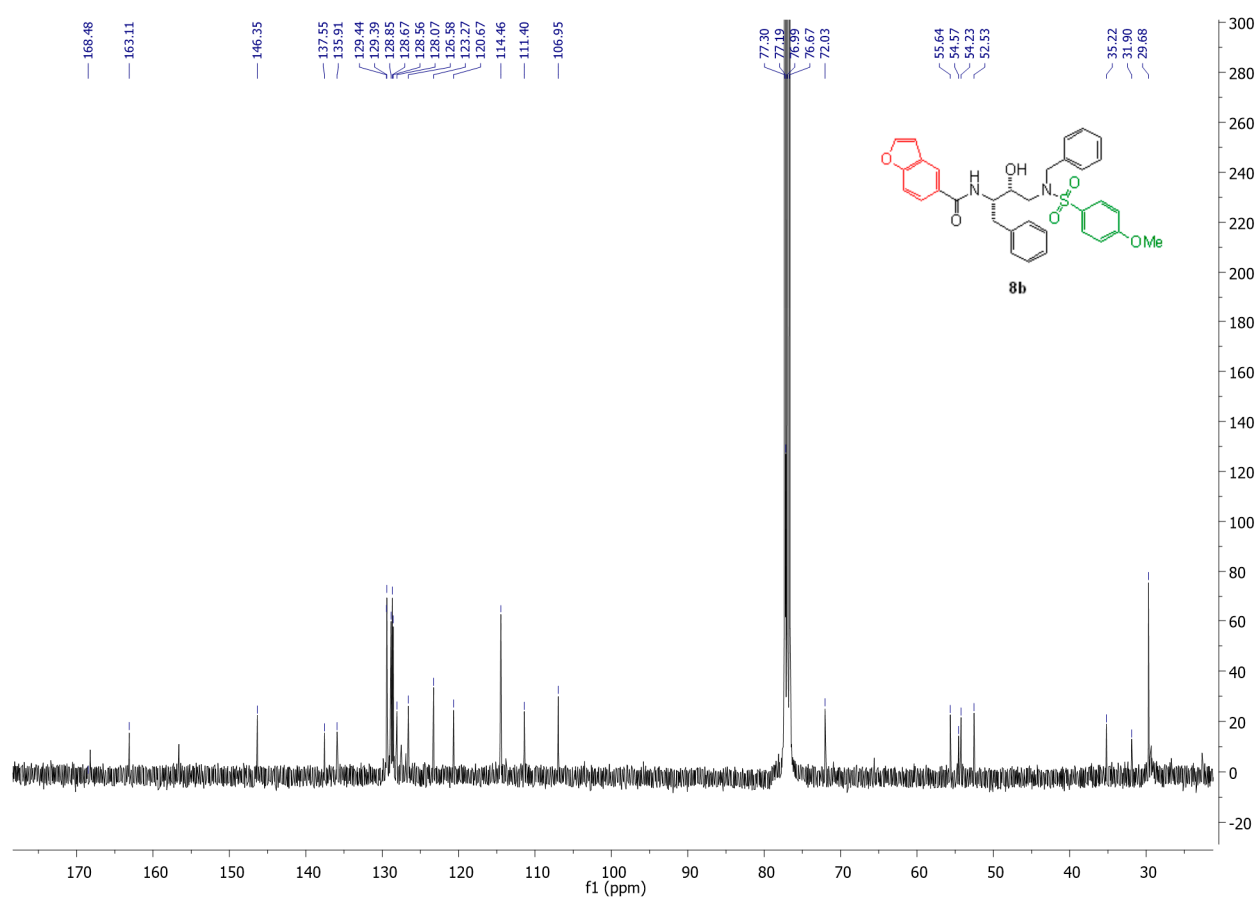

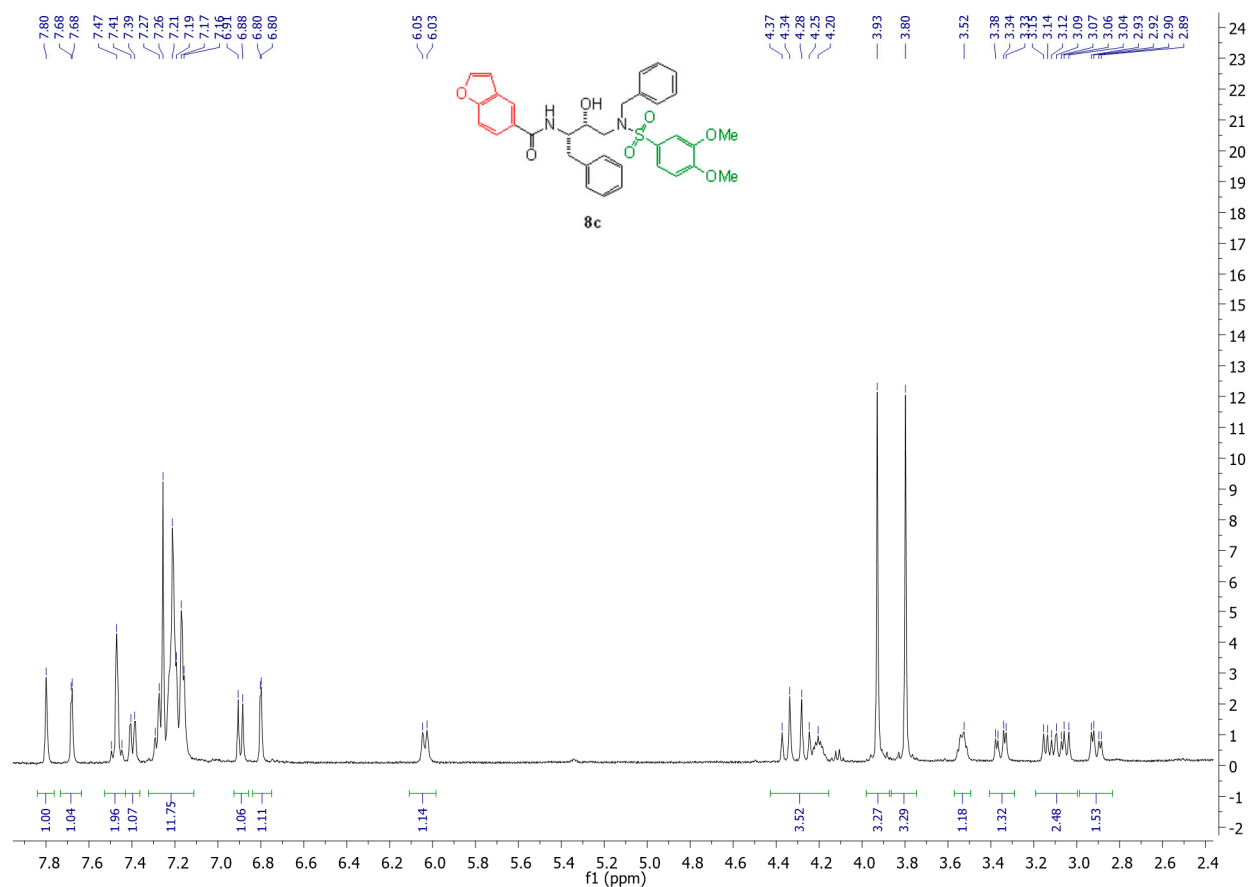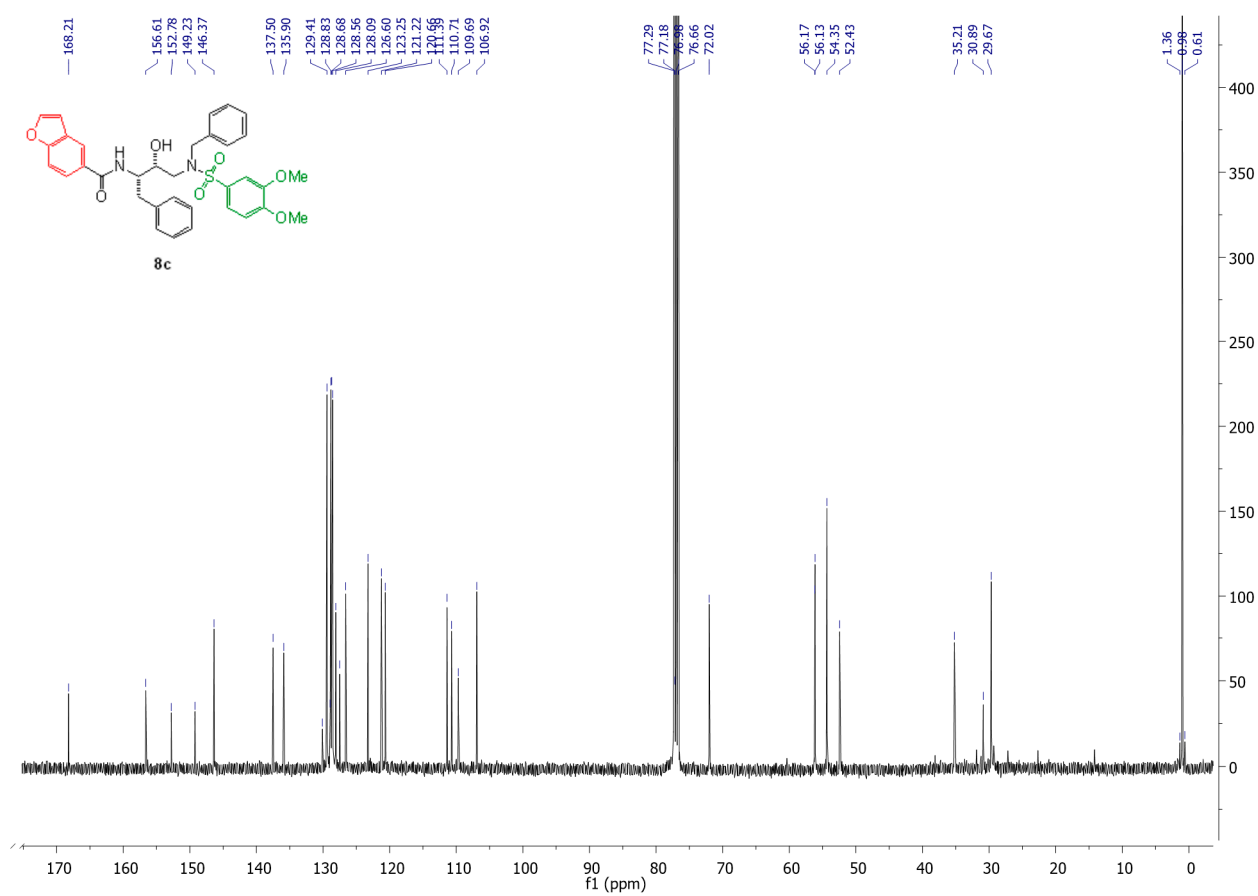

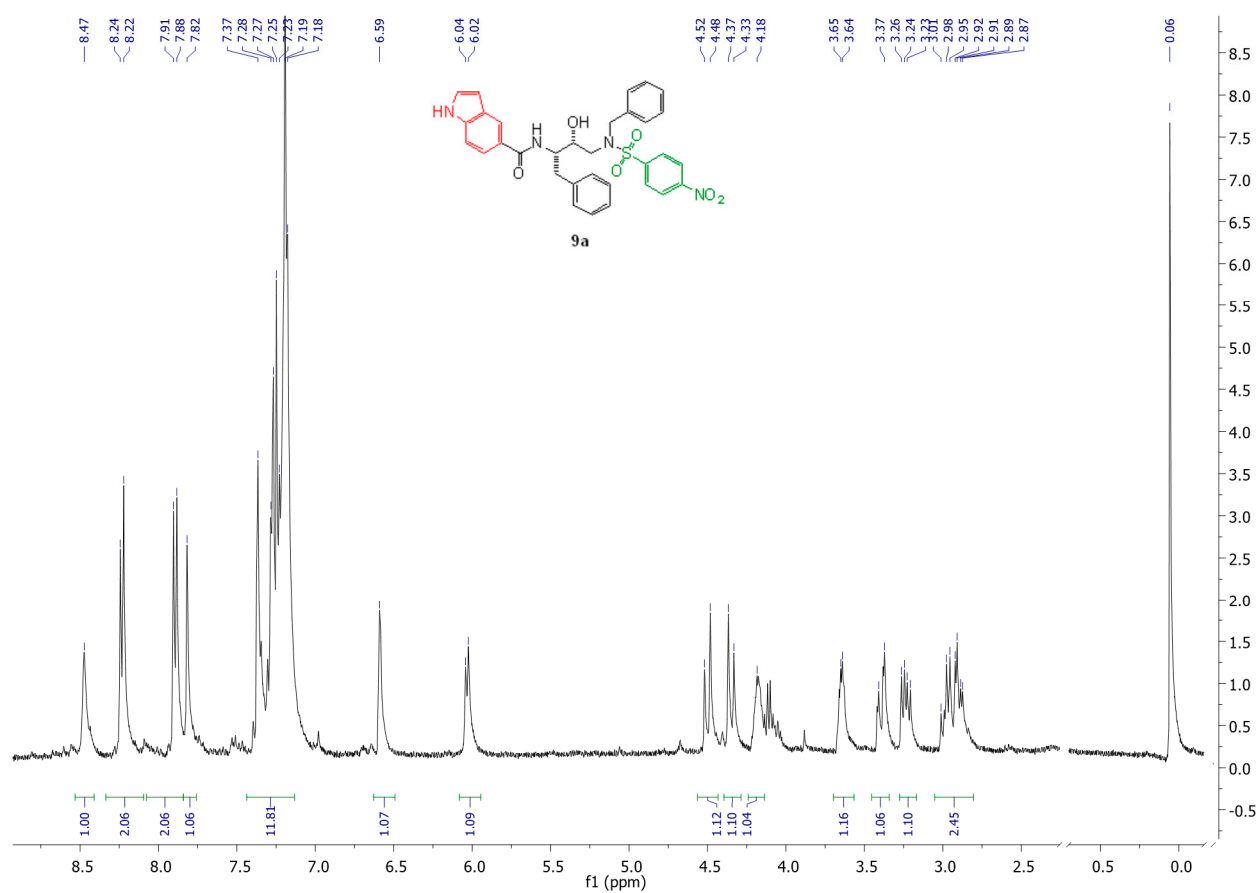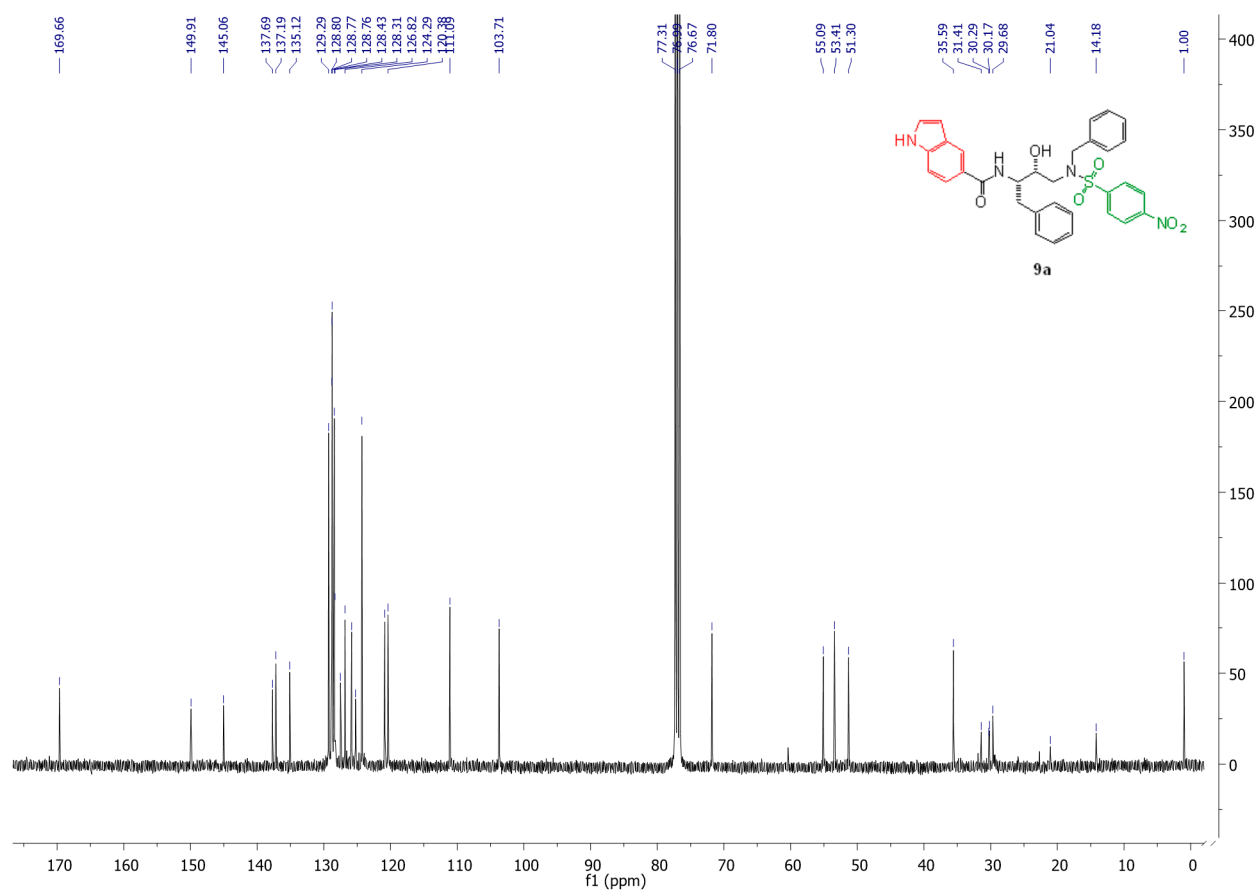

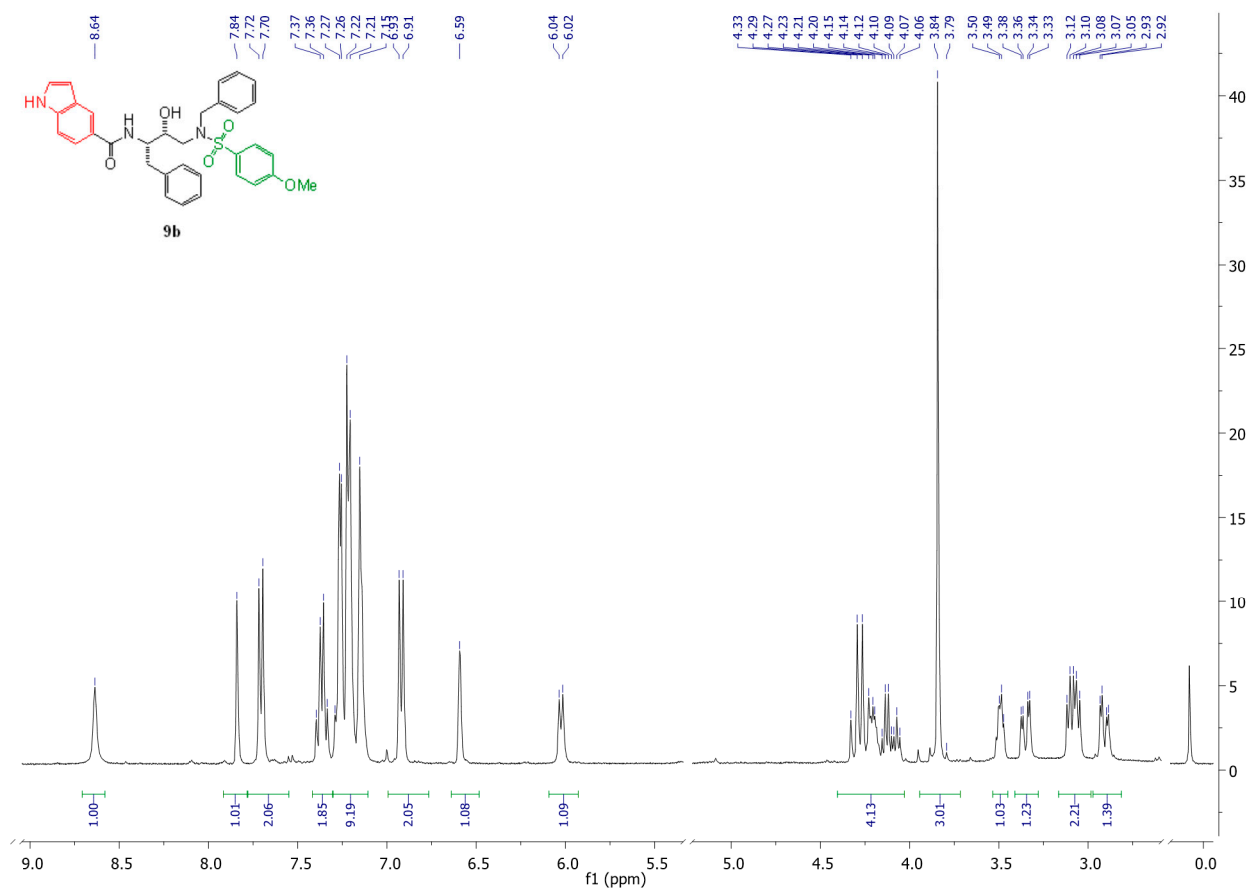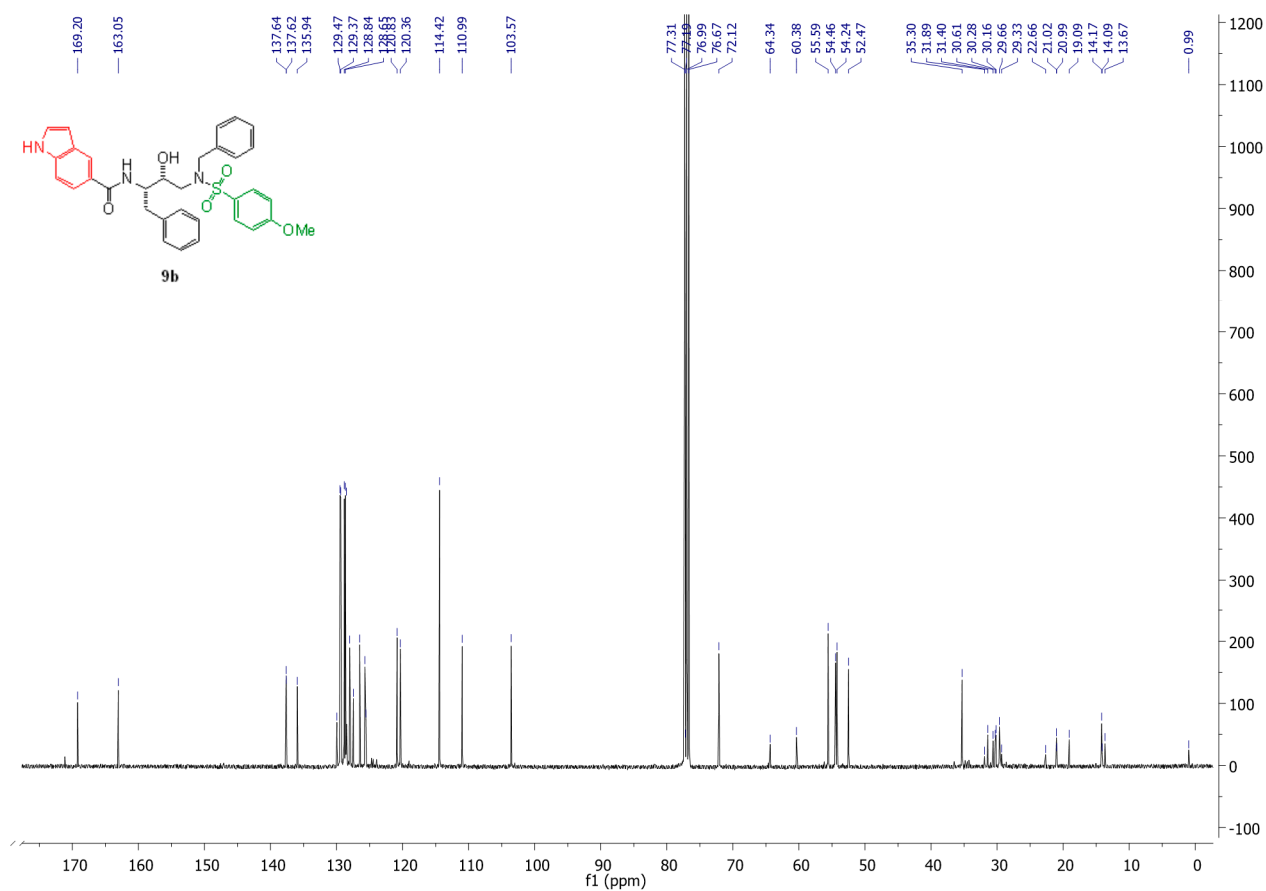

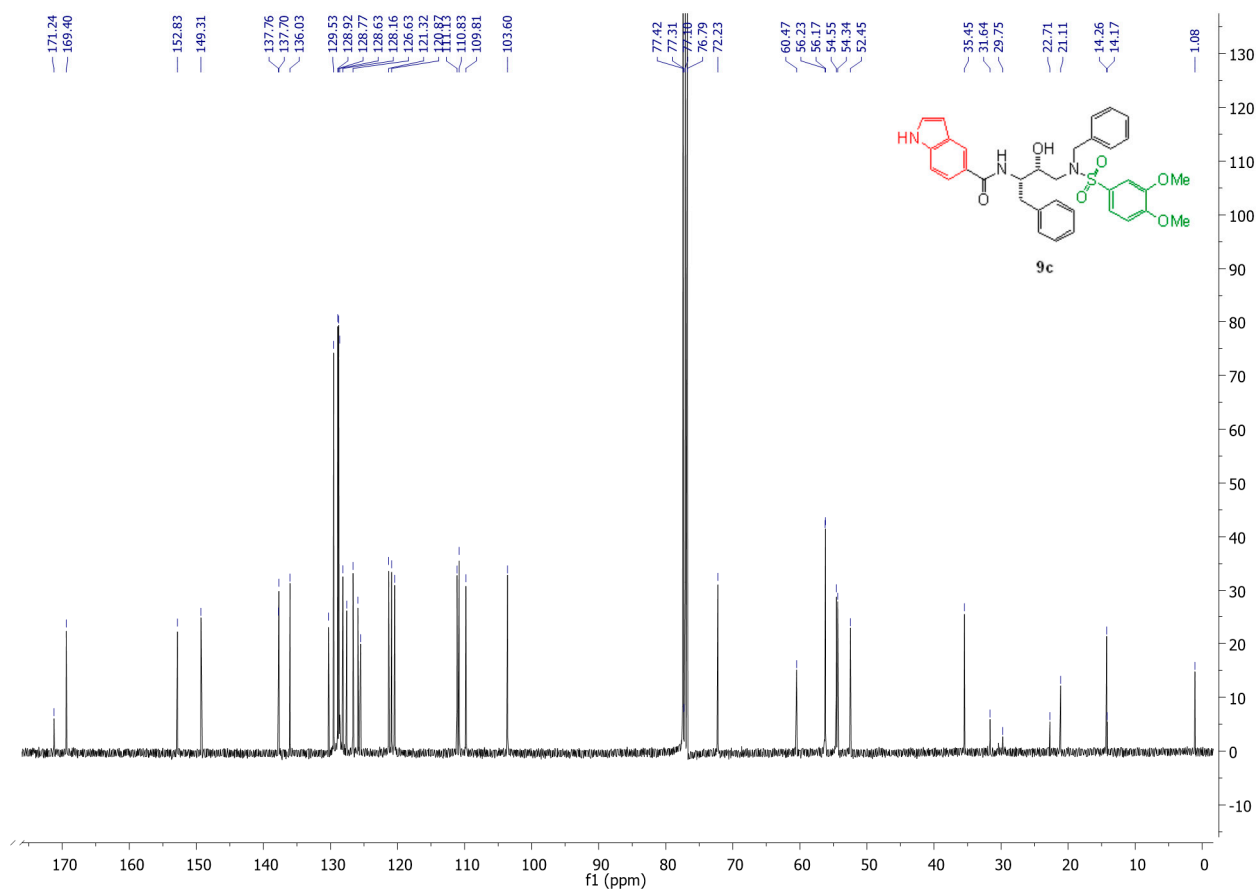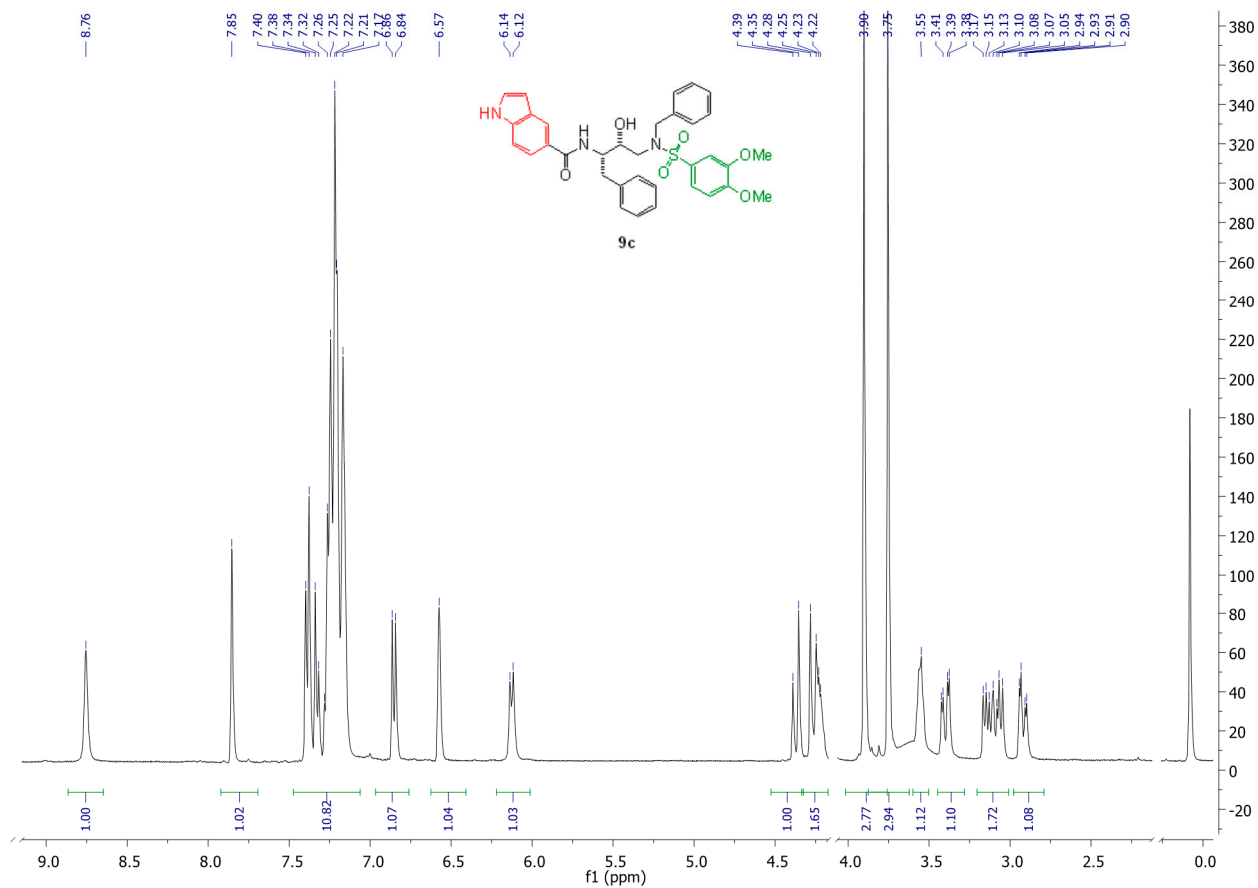

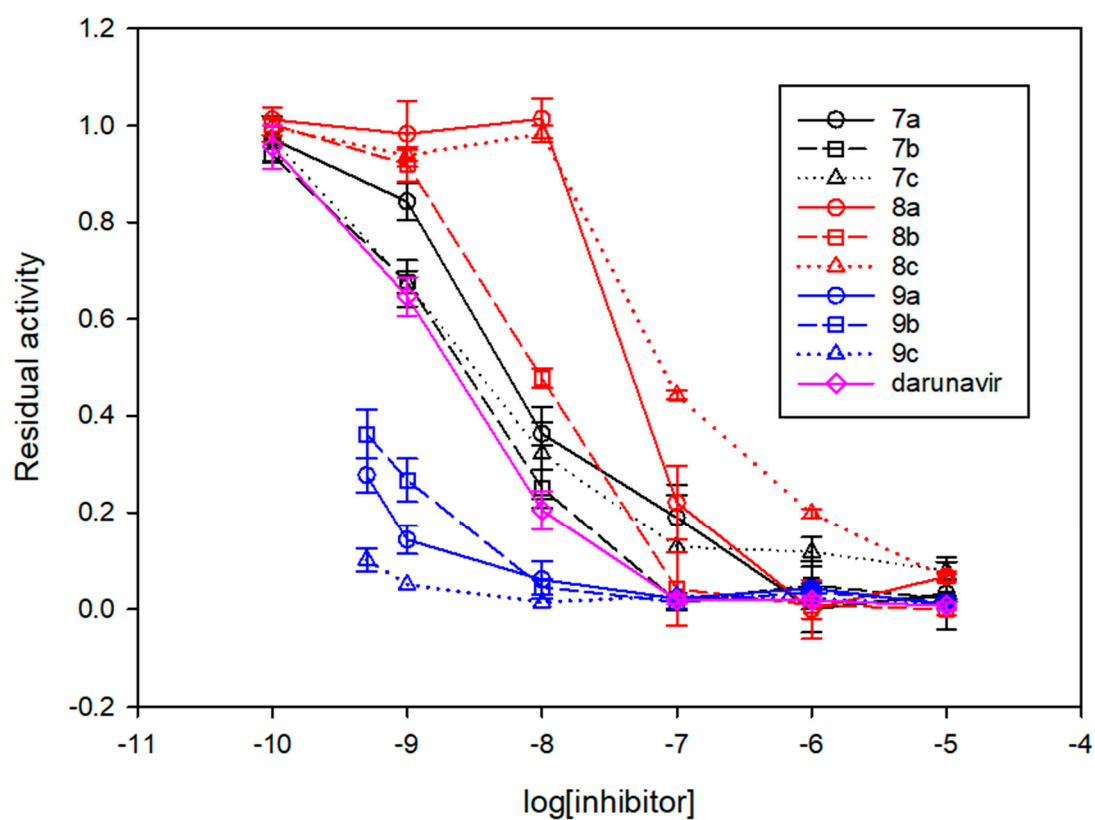

**Supplementary Figure S1.** concentration – response curves for the inhibition of the protease with all the inhibitors.

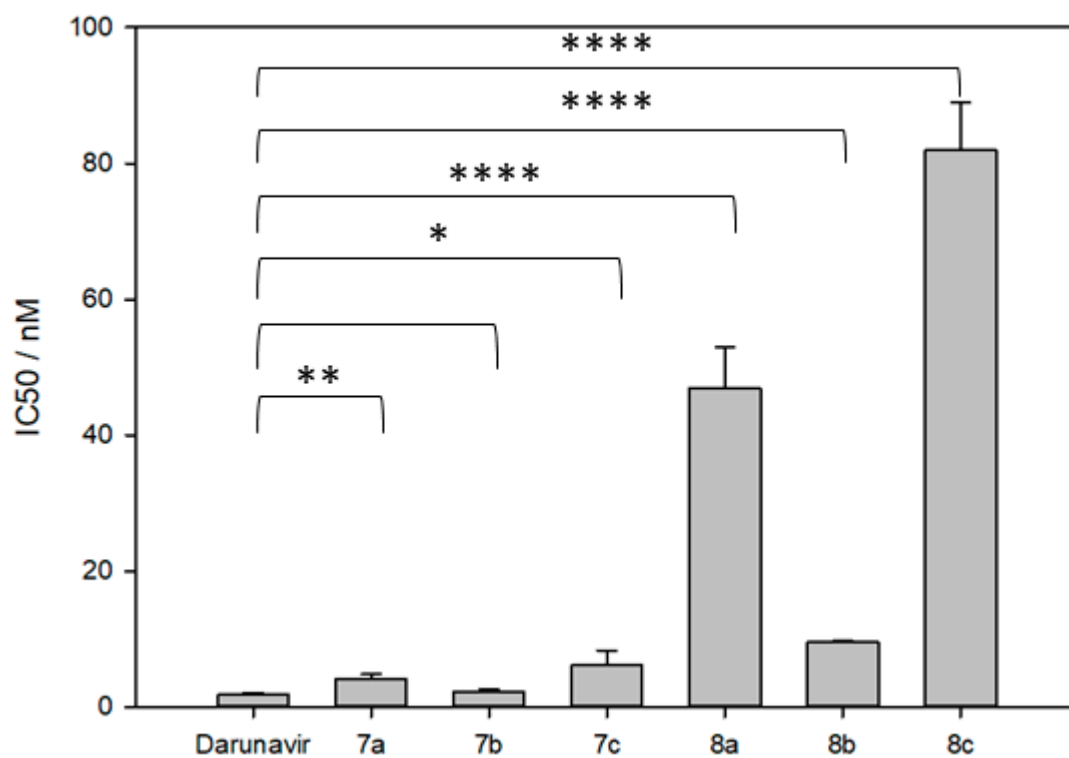

**Supplementary Figure S2.** statistical comparison of the measured IC<sub>50</sub> with respect to darunavir.  
 \*:  $p < 0.01$ ; \*\*:  $p < 0.001$ ; \*\*\*\*:  $p < 0.00001$ .

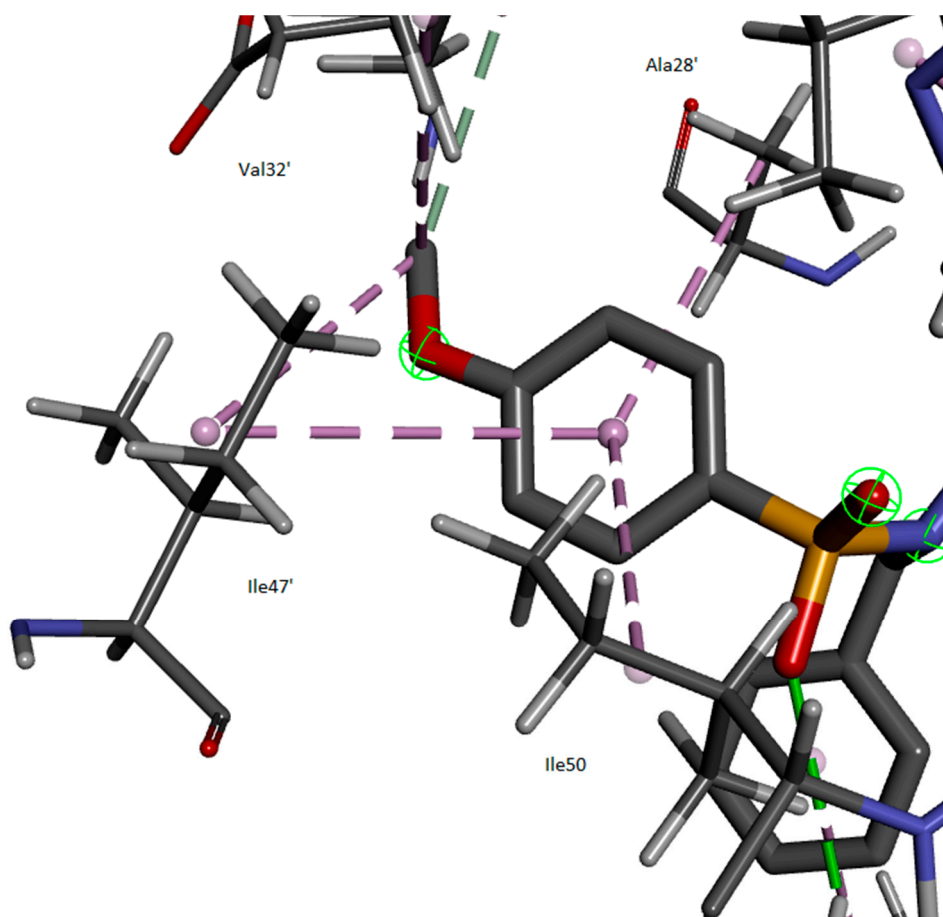

**Supplementary figure S3:** interactions of the 4-methoxyphenyl group at P2' in the model structure of the complex of compound **9b** with the protease.

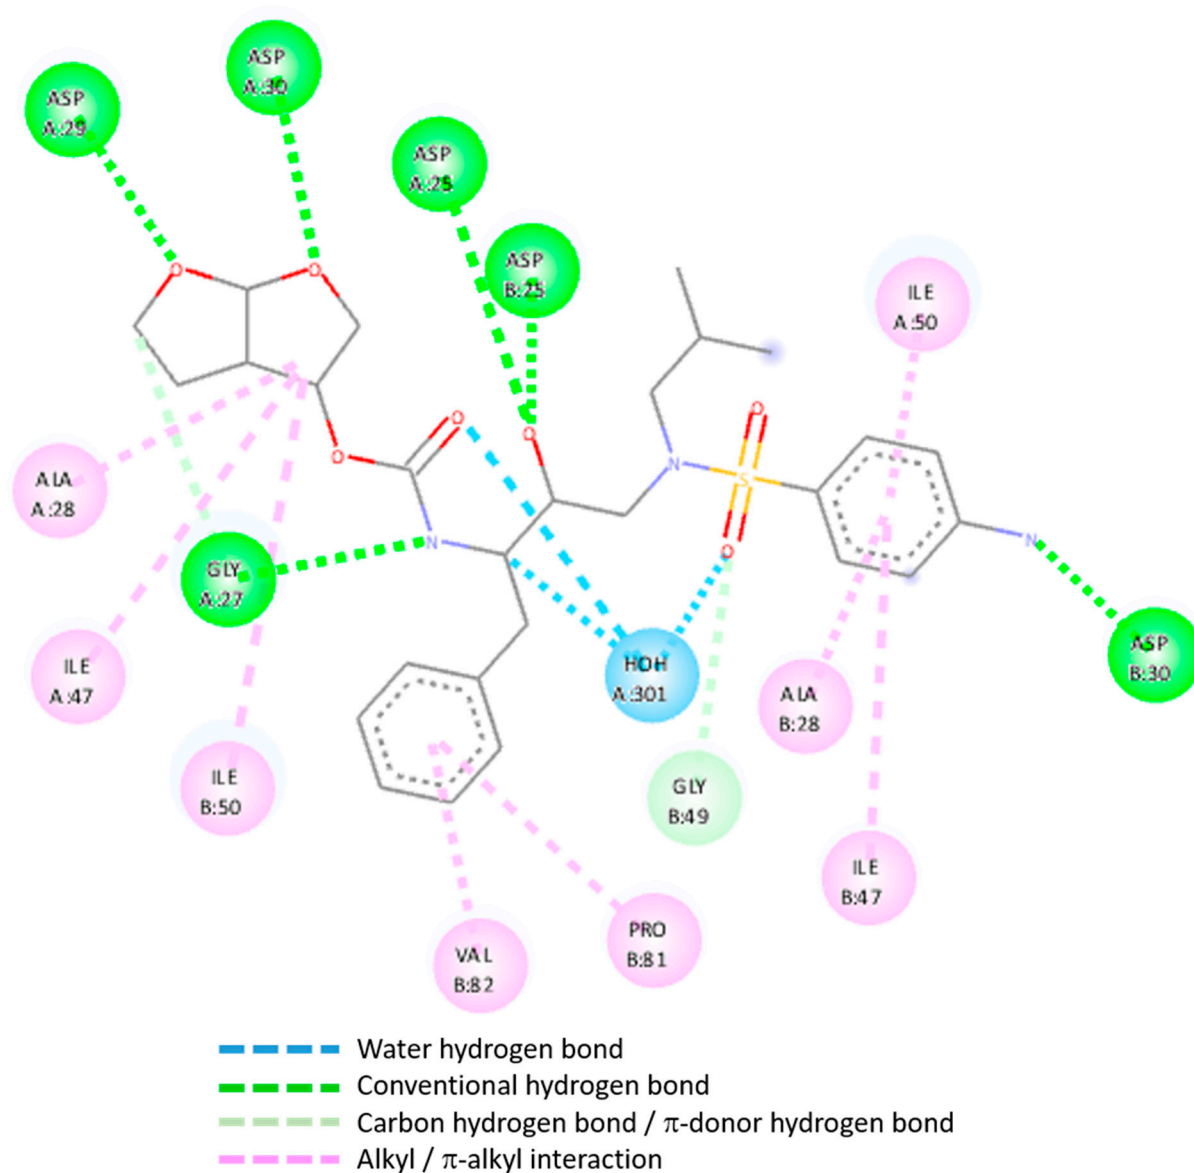

**Supplementary figure S4:** map of the interactions of Darunavir with the protease.

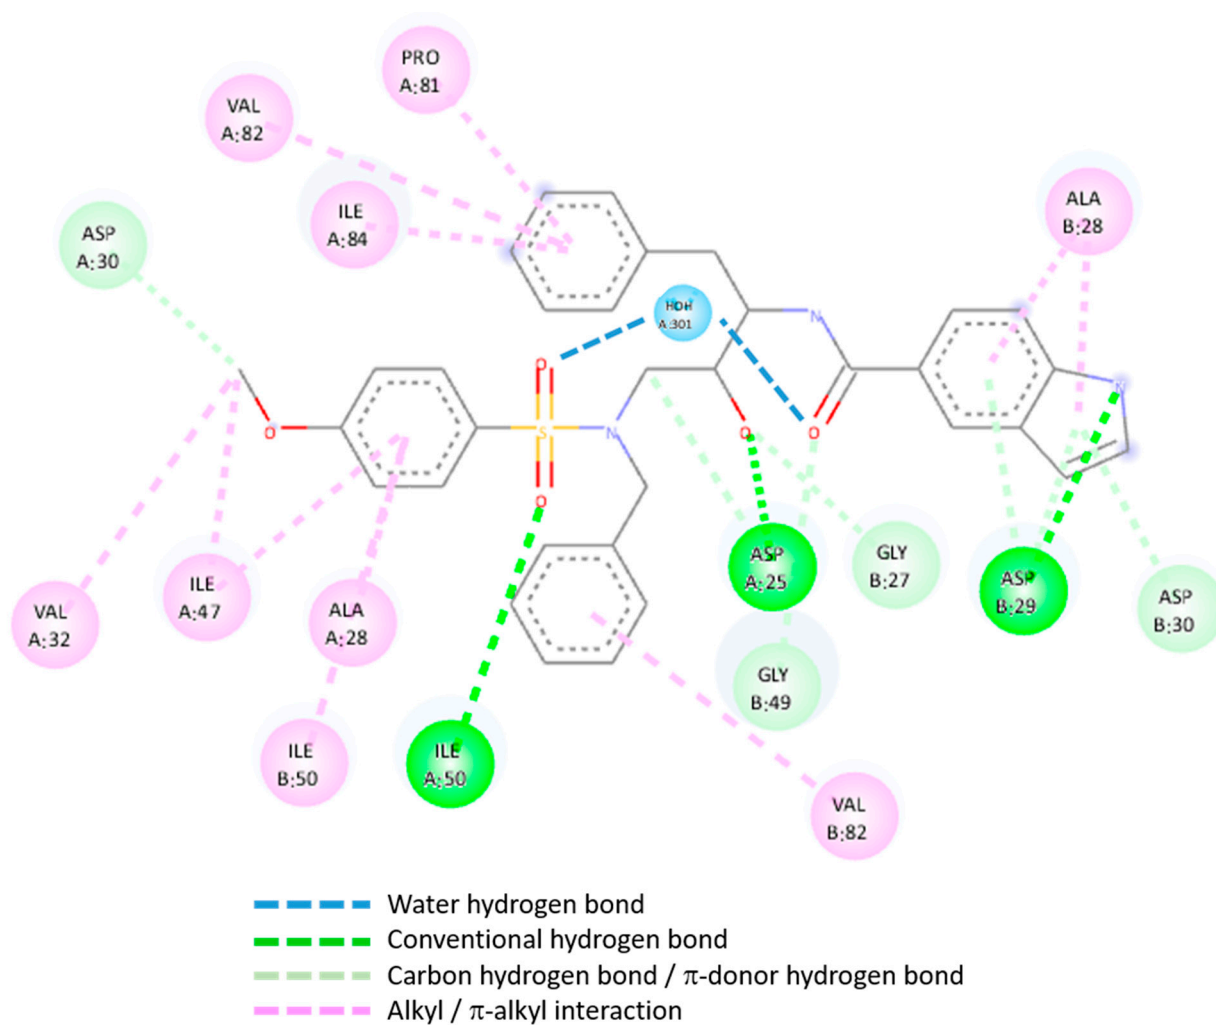

**Supplementary figure S5:** map of the interactions of compound **9b** with the protease.
